# Supplementary material for: Effects of Hypothermia and Allopurinol on Oxidative Status in a Rat Model of Hypoxic Ischemic Encephalopathy
Source: MDPI journal article supplement (doi:10.3390/antiox10101523), 2021-09-25
Supplement: s1 [file s1]

**Table S1.** Plasma TAC levels measured using ABTS.

| ABTS (TEACmM) |                   |
|---------------|-------------------|
| Group (n=62)  | Mean [IQ95%]      |
| C (n=12)      | 5.549 [5.32–5.92] |
| HI (n=10)     | 3.959 [3.42–4.26] |
| HIA (n=10)    | 5.63 [5.11–5.81]  |
| HIH (n=13)    | 4.41 [4.04–4.62]  |
| HIHA (n=17)   | 4.88 [4.62–5.05]  |

Mean [Interquartile range] C: Control, HI: Hypoxia–ischemia, HIA: Hypoxia–ischemia + allopurinol, HIH: Hypoxia–ischemia + hypothermia, HIHA: Hypoxia–ischemia + hypothermia + allopurinol.

**Table S2.** Plasma GSH/GSSG ratio.

| Ratio GSH/GSSG |                  |
|----------------|------------------|
| Groups (n=36)  | Median [IQ95%]   |
| C (n=9)        | 2.23 [1.99–2.67] |
| HI (n=6)       | 1.55 [1.45–1.64] |
| HIA (n=7)      | 4.65 [2.85–5.65] |
| HIH (n=7)      | 3.73 [2.20–5.14] |
| HIHA (n=7)     | 2.80 [2.47–4.50] |

Mean [Interquartile range] C: Control, HI: Hypoxia–ischemia, HIA: Hypoxia–ischemia + allopurinol, HIH: Hypoxia–ischemia + hypothermia, HIHA: Hypoxia–ischemia + hypothermia + allopurinol.

**Table S3.** Cerebral Spinal Fluid TAC levels.

| FRAP CSF (mMFeSO4) |                     |
|--------------------|---------------------|
| Groups (n=41)      | Median [IQ95%]      |
| C (n=9)            | 0.837 [0.647–1.07]  |
| HI (n=9)           | 0.533 [0.485–0.601] |
| HIA (n=9)          | 0.646 [0.588–0.792] |
| HIH (n=6)          | 0.552 [0.505–0.691] |
| HIHA (n=8)         | 0.592 [0.51–0.75]   |

Mean [Interquartile range] C: Control, HI: Hypoxia–ischemia, HIA: Hypoxia–ischemia + allopurinol, HIH: Hypoxia–ischemia + hypothermia, HIHA: Hypoxia–ischemia + hypothermia + allopurinol.

**Table S4.** Plasma carbonyl group levels.

| Carbonyl groups (nmol/gprot) |                    |
|------------------------------|--------------------|
| Groups (n=64)                | Median [IQ95%]     |
| C (n=12)                     | 1.29 [1.06–1.67]   |
| HI (n=12)                    | 3.25 [2.83–3.94]   |
| HIA (n=12)                   | 1.71 [1.35–1.91]   |
| HIH (n=13)                   | 1.89 [1.559–2.186] |
| HIHA (n=15)                  | 1.82 [1.77–1.99]   |

Mean [Interquartile range] C: Control, HI: Hypoxia–ischemia, HIA: Hypoxia–ischemia + allopurinol, HIH: Hypoxia–ischemia + hypothermia, HIHA: Hypoxia–ischemia + hypothermia + allopurinol.

**Table S5.** Lipid peroxidation.

| 8-iso-PGF2 $\alpha$ levels (pg/mg protein) |                            |                                          |
|--------------------------------------------|----------------------------|------------------------------------------|
| Groups ( n=26)                             | Hippocampal Median [IQ95%] | Cortical–subcortical area Median [IQ95%] |
| C (n=5)                                    | 1.27 [1.21–1.54]           | 1.64 [1.25–2.02]                         |
| HI (n=6)                                   | 1.41 [1.39–2.46]           | 2.92 [2.17–3.43]                         |
| HIA (n=6)                                  | 1.48 [1.13–1.70]           | 2.23 [1.40–2.44]                         |
| HIH (n=4)                                  | 1.14 [1.1–1.19]            | 1.41 [1.07–1.78]                         |
| HIHA (n=5)                                 | 1.36 [1.16–1.67]           | 1.82 [1.47–2.14]                         |

Mean [Interquartile range] C: Control, HI: Hypoxia–ischemia, HIA: Hypoxia–ischemia + allopurinol, HIH: Hypoxia–ischemia + hypothermia, HIHA: Hypoxia–ischemia + hypothermia + allopurinol.
